# Supplementary material for: Modifiable risk factors and long term risk of type 2 diabetes among individuals with a history of gestational diabetes mellitus: prospective cohort study
Source: PubMed Central journal article supplement (PMC9490550; doi:10.1136/bmj-2022-070312), 2022-09-21
Supplement: yanj070312.ww.pdf [file yanj070312.ww.pdf]

**Supplementary Table 1** Risk of type 2 diabetes associated with individual modifiable risk factors in women with a history of gestational diabetes mellitus, Nurses' Health Study II (n=4,275)

| Risk factor                                             | Case/<br>person-years | Absolute risk<br>(case per<br>1,000 person-year) | Model 1 <sup>a</sup><br>HR (95% CI) | Model 2 <sup>b</sup><br>HR (95% CI) | Model 2 + BMI <sup>c</sup><br>HR (95% CI) |
|---------------------------------------------------------|-----------------------|--------------------------------------------------|-------------------------------------|-------------------------------------|-------------------------------------------|
| <b>BMI, kg/m<sup>2</sup></b>                            |                       |                                                  |                                     |                                     |                                           |
| <23.0                                                   | 26/21421.9            | 1.2                                              | 1.00 (ref)                          | 1.00 (ref)                          |                                           |
| 23.0-24.9                                               | 49/13458.2            | 3.6                                              | 2.77 (1.70 to 4.51)                 | 2.74 (1.68 to 4.49)                 |                                           |
| 25.0-29.9                                               | 208/27247.7           | 7.6                                              | 5.96 (3.93 to 9.03)                 | 5.72 (3.75 to 8.71)                 |                                           |
| 30.0+                                                   | 641/27212.0           | 23.6                                             | 18.53 (12.40 to 27.70)              | 16.38 (10.87 to 24.67)              |                                           |
| <b>Physical activity<br/>(median, MET-<br/>hr/week)</b> |                       |                                                  |                                     |                                     |                                           |
| Q1 (1.0)                                                | 277/17584.2           | 15.8                                             | 1.00 (ref)                          | 1.00 (ref)                          | 1.00 (ref)                                |
| Q2 (5.1)                                                | 213/17693.2           | 12.0                                             | 0.75 (0.62 to 0.92)                 | 0.76 (0.62 to 0.93)                 | 0.92 (0.74 to 1.15)                       |
| Q3 (10.9)                                               | 174/17700.9           | 9.8                                              | 0.61 (0.49 to 0.75)                 | 0.63 (0.50 to 0.76)                 | 0.89 (0.71 to 1.12)                       |
| Q4 (20.9)                                               | 153/17988.7           | 8.5                                              | 0.53 (0.43 to 0.66)                 | 0.58 (0.47 to 0.73)                 | 0.85 (0.67 to 1.08)                       |
| Q5 (46.2)                                               | 107/18372.8           | 5.8                                              | 0.36 (0.28 to 0.46)                 | 0.38 (0.29 to 0.49)                 | 0.62 (0.48 to 0.81)                       |
| <i>p</i> -trend <sup>d</sup>                            |                       |                                                  | <0.001                              | <0.001                              | <0.001                                    |
| <b>Modified AHEI<br/>without alcohol<br/>(median)</b>   |                       |                                                  |                                     |                                     |                                           |
| Q1 (32.9)                                               | 211/17317.5           | 12.2                                             | 1.00 (ref)                          | 1.00 (ref)                          | 1.00 (ref)                                |
| Q2 (39.7)                                               | 201/17504.3           | 11.5                                             | 0.84 (0.68 to 1.04)                 | 0.94 (0.75 to 1.17)                 | 1.01 (0.80 to 1.28)                       |
| Q3 (44.6)                                               | 196/17775.4           | 11.0                                             | 0.77 (0.62 to 0.96)                 | 0.95 (0.76 to 1.19)                 | 0.97 (0.77 to 1.23)                       |
| Q4 (49.8)                                               | 169/18067.7           | 9.4                                              | 0.64 (0.51 to 0.80)                 | 0.86 (0.67 to 1.09)                 | 0.90 (0.70 to 1.16)                       |
| Q5 (57.7)                                               | 147/18674.9           | 7.9                                              | 0.54 (0.42 to 0.68)                 | 0.79 (0.61 to 1.01)                 | 0.96 (0.73 to 1.25)                       |
| <i>p</i> -trend                                         |                       |                                                  | <0.001                              | 0.05                                | 0.51                                      |

|                |             |      |                     |                     |                     |
|----------------|-------------|------|---------------------|---------------------|---------------------|
| Alcohol, g/day |             |      |                     |                     |                     |
| Never          | 368/29775.6 | 12.4 | 1.00 (ref)          | 1.00 (ref)          | 1.00 (ref)          |
| 0-4.9          | 461/42805.9 | 10.8 | 0.82 (0.70 to 0.96) | 0.89 (0.76 to 1.04) | 0.97 (0.82 to 1.15) |
| 5.0-14.9       | 71/13691.8  | 5.2  | 0.40 (0.30 to 0.53) | 0.50 (0.37 to 0.67) | 0.68 (0.50 to 0.92) |
| 15.0+          | 24/3066.4   | 7.8  | 0.56 (0.36 to 0.88) | 0.64 (0.39 to 1.03) | 0.82 (0.50 to 1.34) |
| Smoking        |             |      |                     |                     |                     |
| Never          | 628/60568.8 | 10.4 | 1.00 (ref)          | 1.00 (ref)          | 1.00 (ref)          |
| Past           | 230/21968.9 | 10.5 | 0.98 (0.83 to 1.16) | 1.05 (0.89 to 1.25) | 0.91 (0.76 to 1.09) |
| Current        | 66/6802.0   | 9.7  | 0.92 (0.70 to 1.22) | 0.87 (0.65 to 1.16) | 0.99 (0.73 to 1.33) |

Abbreviations: AHEI: Alternate Healthy Eating Index; BMI: body mass index; CI: confidence interval; GDM: gestational diabetes mellitus; HR: hazard ratio; T2D: type 2 diabetes.

<sup>a</sup> Model 1 was adjusted for age (months).

<sup>b</sup> Model 2 was additionally adjusted for race (white, non-white), parity (1, 2, 3+), age at first live birth (<30 years, ≥30 years), total duration of breastfeeding (none to < 1 month, 1-6 months, 6-12 months, >12 months), oral contraceptive use (never, past, current), menopausal status (premenopausal, postmenopausal), family history of diabetes in first-degree relatives (yes, no), total energy intake in kcal/day (quartiles), and all the other risk factors except BMI depending on the model (modified AHEI score in quintiles, physical activity in quartiles, categorical alcohol, categorical smoking status).

<sup>c</sup> BMI (kg/m<sup>2</sup>, continuous) reported concurrent with other risk factors of interest was additionally adjusted.

<sup>d</sup> Number of optimal levels of modifiable risk factors was entered as a continuous variable into the model to estimate *p*-value for trend.

**Supplementary Table 2** Risk of type 2 diabetes in women with a history of gestational diabetes mellitus by number of optimal modifiable factors excluding body mass index, Nurses' Health Study II (n=4,275)

|                                                                 | Cases/person-years | Absolute risk (case/1,000 person-year) | Model 1 <sup>a</sup><br>HR (95% CI) | Model 2 <sup>b</sup><br>HR (95% CI) | Model 2+BMI <sup>c</sup><br>HR (95% CI) |
|-----------------------------------------------------------------|--------------------|----------------------------------------|-------------------------------------|-------------------------------------|-----------------------------------------|
| Number of optimal modifiable factors excluding BMI <sup>d</sup> |                    |                                        |                                     |                                     |                                         |
| 0                                                               | 30/1968.6          | 15.2                                   | 1.00 (ref)                          | 1.00 (ref)                          | 1.00 (ref)                              |
| 1                                                               | 324/22248.1        | 14.6                                   | 1.00 (0.65 to 1.52)                 | 1.04 (0.68 to 1.60)                 | 0.79 (0.50 to 1.24)                     |
| 2                                                               | 371/34478.0        | 10.8                                   | 0.71 (0.47 to 1.07)                 | 0.75 (0.49 to 1.15)                 | 0.73 (0.47 to 1.13)                     |
| 3                                                               | 171/25195.1        | 6.8                                    | 0.42 (0.27 to 0.65)                 | 0.46 (0.29 to 0.72)                 | 0.54 (0.34 to 0.87)                     |
| 4                                                               | 28/5450.0          | 5.1                                    | 0.31 (0.18 to 0.55)                 | 0.35 (0.19 to 0.62)                 | 0.51 (0.28 to 0.94)                     |
| <i>p</i> -trend <sup>e</sup>                                    |                    |                                        | <0.001                              | <0.001                              | <0.001                                  |

Abbreviations: AHEI: Alternate Healthy Eating Index; BMI: body mass index; CI: confidence interval; GDM: gestational diabetes mellitus; HR: hazard ratio; T2D: type 2 diabetes.

<sup>a</sup> Model was adjusted for age (months).

<sup>b</sup> Model was additionally adjusted for race (white, non-white), parity (1, 2, 3+), age at first live birth (<30 years, ≥30 years), total duration of breastfeeding (none to < 1 month, 1-6 months, 6-12 months, >12 months), oral contraceptive use (never, former, current), menopausal status (premenopausal, postmenopausal), family history of diabetes in first-degree relatives (yes, no), and total energy intake (quartiles, kcal/day).

<sup>c</sup> BMI (kg/m<sup>2</sup>, continuous) reported concurrent with other risk factors of interest was additionally adjusted.

<sup>d</sup> The optimal level of each factor was defined as follows: 1) current non-smoker (including never or past smoker); 2) top two quintiles of the modified AHEI score; 3) ≥150 min/week of moderate-intensity or ≥75 min/week of vigorous-intensity physical activity; 4) alcohol intake 5.0-14.9 g/day.

<sup>e</sup> Number of optimal levels of modifiable risk factors was entered as a continuous variable into the model to estimate *p*-value for trend.

**Supplementary Table 3** Risk of type 2 diabetes in women with a history of gestational diabetes mellitus by number of optimal modifiable factors using multiple imputation for modifiable factors with missing values, Nurses' Health Study II (n=4,275)

|                                                   | Model 1 <sup>a</sup><br>HR (95% CI) | Model 2 <sup>b</sup><br>HR (95% CI) |
|---------------------------------------------------|-------------------------------------|-------------------------------------|
| Number of optimal modifiable factors <sup>c</sup> |                                     |                                     |
| 0                                                 | 1.00 (ref)                          | 1.00 (ref)                          |
| 1                                                 | 0.97 (0.56 to 1.68)                 | 0.92 (0.54 to 1.58)                 |
| 2                                                 | 0.61 (0.35 to 1.08)                 | 0.61 (0.35 to 1.08)                 |
| 3                                                 | 0.35 (0.20 to 0.60)                 | 0.36 (0.21 to 0.62)                 |
| 4                                                 | 0.13 (0.07 to 0.23)                 | 0.13 (0.07 to 0.24)                 |
| 5                                                 | 0.12 (0.05 to 0.30)                 | 0.12 (0.05 to 0.29)                 |
| <i>p</i> -trend <sup>d</sup>                      | <0.001                              | <0.001                              |

Abbreviations: AHEI: Alternate Healthy Eating Index; BMI: body mass index; CI: confidence interval; GDM: gestational diabetes mellitus; HR: hazard ratio; T2D: type 2 diabetes.

<sup>a</sup> Model was adjusted for age (months).

<sup>b</sup> Model was additionally adjusted for race (white, non-white), parity (1, 2, 3+), age at first live birth (<30 years, ≥30 years), total duration of breastfeeding (none to < 1 month, 1-6 months, 6-12 months, >12 months), oral contraceptive use (never, former, current), menopausal status (premenopausal, postmenopausal), family history of diabetes in first-degree relatives (yes, no), and total energy intake (quartiles, kcal/day).

<sup>c</sup> The optimal level of each factor was defined as follows: 1) current non-smoker (including never or past smoker); 2) BMI < 25.0 kg/m<sup>2</sup>; 3) top two quintiles of the modified AHEI score; 4) ≥150 min/week of moderate-intensity or ≥75 min/week of vigorous-intensity physical activity; 5) alcohol intake 5.0-14.9 g/day.

<sup>d</sup> Number of optimal levels of modifiable risk factors was entered as a continuous variable into the model to estimate *p*-value for trend.

**Supplementary Table 4** Change in the number of optimal levels of modifiable factors from baseline to the most recent follow-up in association with T2D risk in women with a history of gestational diabetes mellitus, Nurses' Health Study II (n=4,275)

|                                                                           | Cases/person-years | Absolute risk (case/1,000 person-year) | Model 1 HR (95% CI) <sup>a</sup> | Model 2 HR (95% CI) <sup>b</sup> | Model 2 + baseline number of optimal factors HR (95% CI) |
|---------------------------------------------------------------------------|--------------------|----------------------------------------|----------------------------------|----------------------------------|----------------------------------------------------------|
| Change in the number of optimal levels of modifiable factors <sup>c</sup> |                    |                                        |                                  |                                  |                                                          |
| Decrease (-1 or more)                                                     | 220/17168.4        | 12.8                                   | 0.99 (0.83 to 1.18)              | 0.96 (0.80 to 1.16)              | 1.58 (1.30 to 1.93)                                      |
| No change (0)                                                             | 450/32714.1        | 13.8                                   | 1.00 (ref)                       | 1.00 (ref)                       | 1.00 (ref)                                               |
| Moderate increase (1)                                                     | 202/26192.0        | 7.7                                    | 0.55 (0.46 to 0.66)              | 0.56 (0.46 to 0.67)              | 0.45 (0.37 to 0.55)                                      |
| Great increase (2 or more)                                                | 52/13265.3         | 3.9                                    | 0.26 (0.19 to 0.36)              | 0.26 (0.19 to 0.36)              | 0.14 (0.10 to 0.20)                                      |

Abbreviations: AHEI: Alternate Healthy Eating Index; BMI: body mass index; CI: confidence interval; GDM: gestational diabetes mellitus; HR: hazard ratio; T2D: type 2 diabetes. ss

<sup>a</sup> Model was adjusted for age (months).

<sup>b</sup> Model was additionally adjusted for race (white, non-white), parity (1, 2, 3+), age at first live birth (<30 years, ≥30 years), total duration of breastfeeding (none to < 1 month, 1-6 months, 6-12 months, >12 months), oral contraceptive use (never, former, current), menopausal status (premenopausal, postmenopausal), family history of diabetes in first-degree relatives (yes, no), and total energy intake (quartiles, kcal/day) at baseline.

<sup>c</sup> The optimal level of each factor was defined as follows: 1) current non-smoker (including never or past smoker); 2) BMI < 25.0 kg/m<sup>2</sup>; 3) top two quintiles of the modified AHEI score; 4) ≥150 min/week of moderate-intensity or ≥75 min/week of vigorous-intensity physical activity; 5) alcohol intake 5.0-14.9 g/day.
